# Supplementary material
Source: Royal Society of Chemistry journal article supplement (doi:10.1039/d5va00466g)
Supplement: d5va00466g1.pdf [file d5va00466g1.pdf]

## 1 **Supplementary material**

### 2 **S.2.6. Data analysis using multiple pollution and risk assessment approaches**

#### 3 **2.6.1. Coefficient of condition (K)**

4 The coefficient of condition (K) is a measure used to assess the general health and well-being of  
5 fish, typically reflecting their nutritional status and growth trends.

6 A species' K value of >1 indicates that they are in perfect condition, whereas a value of <1 indicates  
7 that the fish's health is not good [50].

#### 8 **2.6.2. Metal pollution index (MPI)**

9 Using the metal pollution index (MPI), the relative severity of total metal deposition in the muscles  
10 of fish was ascertained.

11 MPI of 2 to 3 suggests a moderate level of pollution, 1 to 2 indicates a mild level of pollution, and  
12 less than 1 shows negligible level of pollution impact [122].

#### 13 **2.6.3. Bioconcentration factor (BCF)**

14 The net effect of a material entering the biota through water and being absorbed, distributed, and  
15 eliminated is known as the bioconcentration factor [82].

16 BCF >1 is an indication of efficient uptake of a contaminant by the organism. A BCF <1 fewer  
17 uptake of the contaminant [123].

## 18 **S2.7. Health Risk Assessment**

### 19 **Interpretation of Parameters in Equation (5): Average Daily Dose (ADD)**

- 20 • **C (bioaccessible):** Bioaccessible concentration of metal in fish muscle (mg/kg), estimated  
21 using *in vitro* digestion methods.
- 22 • **IR (Ingestion Rate):** The amount of fish consumed per day:
  - 23 ○ Fisherfolk adults: 0.10 mg/day
  - 24 ○ Fisherfolk children: 0.05 mg/day
  - 25 ○ General population adults: 0.01 mg/day
  - 26 ○ General population children: 0.005 mg/day

27 • **EF (Exposure Frequency):** Number of exposure days per year (365 days/year).

28 • **ED (Exposure Duration):**

29 ○ Adults: 70 years

30 ○ Children: 10 years

31 • **BW (Body Weight):**

32 Adults: 73 kg

33 Children: 32.7 kg

34 • **AT (Averaging Time):**

35 • For non-carcinogenic risk:  $ED \times 365$  days

36 ○ Adults: 25,550 days

37 ○ Children: 3,650 days [124-127]

### 38 **Interpretation of Equation (6): Hazard Quotient (HQ)**

39 • **HQ (Hazard Quotient):** Ratio of estimated metal exposure to its reference dose.

40 • **RfD (Reference Dose):** Acceptable daily oral intake of metal (mg/kg/day).

41 Values used [128]:

42 ○ Zn: 0.3

43 ○ Cd: 0.001

44 ○ Pb: 0.006

45 ○ Ni: 0.02

46 ○ Al: 1.00

47 ○ As: 0.0003

48 ○ Co: 0.0003

49 ○ Cr: 0.003

50 ○ Cu: 0.04

51 ○ Mn: 0.14

52 ○ Se: 0.005

- 53 •  $HQ \leq 1 \rightarrow$  No significant health risk
- 54 •  $HQ > 1 \rightarrow$  Potential non-carcinogenic health effects

55 **Interpretation of Equation (7): Hazard Index (HI)**

- 56 • **HI (Hazard Index):** Sum of HQs for all metals assessed for a specific population group.
- 57 •  $HI \leq 1 \rightarrow$  Cumulative exposure is within safe limits
- 58 •  $HI > 1 \rightarrow$  Potential health concern due to combined metal exposure [129-131].

59 **Interpretation of Equation (8): Carcinogenic Risk (CR)**

- 60 • **CR (Carcinogenic Risk):** Probability of developing cancer over a lifetime due to exposure
- 61 to a carcinogenic metal.
- 62 • **CSFo (Cancer Slope Factor oral):** Indicates the risk per mg/kg/day of intake. Values used
- 63 [132]:
  - 64 ○ Cd: 0.38
  - 65 ○ Pb: 0.0085
  - 66 ○ Ni: 1.7
  - 67 ○ As: 1.5
  - 68 ○ Cr: 0.5
- 69 •  $CR > 10^{-4} \rightarrow$  Unacceptable cancer risk
- 70 •  $10^{-6} < CR \leq 10^{-4} \rightarrow$  Acceptable risk
- 71 •  $CR \leq 10^{-6} \rightarrow$  Negligible risk

72

73

74

75

76 **Table S1.** Common and scientific names, feeding nature and habitat of the examined fish species  
 77 from Rawal Lake

| Common name        | Scientific name                    | Feeding nature and behavior             | Habitat                                       | References |
|--------------------|------------------------------------|-----------------------------------------|-----------------------------------------------|------------|
| Silver carp        | <i>Hypophthalmichthys molitrix</i> | Herbivorous, Surface feeder             | Surface layer                                 | [133]      |
| Mozambique Tilapia | <i>Oreochromis mossambicus</i>     | Omnivorous                              | shallow water upto 30cm deep                  | [134]      |
| Mori/Murakhi       | <i>Cirrhinus mrigala</i>           | Omnivorous/Detritivorous, Bottom feeder | Bottom layer                                  | [135]      |
| Thala              | <i>Catla catla</i>                 | Planktivorous, Surface feeder           | Surface layer                                 | [136]      |
| Grass Carp         | <i>Ctenopharyngodon idella</i>     | Herbivorous, Surface feeder             | Surface layer                                 | [133]      |
| Common carp        | <i>Cyprinus Carpio</i>             | Omnivorous                              | Littoral zone in spring, Deep water in winter | [137]      |

78

79 **Table S2.** The geographic coordinates of the sampling sites and surrounding catchment areas

80

81

82

| Water Sampling Site | Latitude | Longitude |
|---------------------|----------|-----------|
| 1                   | 33.6972  | 73.1253   |
| 2                   | 33.7167  | 73.1481   |
| 3                   | 33.7017  | 73.1233   |
| 4                   | 33.7108  | 73.1316   |
| 5                   | 33.7106  | 73.1260   |
| Catchment area      | Latitude | Longitude |
| Islamabad club      | 33.7003  | 73.1064   |
| Bani Gala           | 33.7124  | 73.1584   |
| Lake view park      | 33.7153  | 73.1305   |
| Malpur              | 33.7275  | 73.1495   |

88

89

90

91

92 **Table S3.** Physicochemical properties of water samples collected from Rawal Lake

| Sampling sites                  | pH             | EC(uSC/cm)      | TDS(mg/l)      | Turbidity(NTU) | Hardness(mg/l) |
|---------------------------------|----------------|-----------------|----------------|----------------|----------------|
| <b>WHO<br/>guidelines(2002)</b> | <b>6.5-8.5</b> | <b>&lt;1000</b> | <b>&lt;500</b> | <b>&lt;5</b>   | <b>&lt;500</b> |
| <b>Site 1</b>                   | 8.55±0.31      | 398±10.64       | 224±7.72       | 0.94±0.01      | 156±17.18      |
| <b>Site 2</b>                   | 8.96±0.44      | 391±31.54       | 202±18.07      | 0.78±0.02      | 173±17.69      |
| <b>Site 3</b>                   | 9.84±0.15      | 395±16.02       | 210±11.35      | 1.02±0.07      | 136±2.41       |
| <b>Site 4</b>                   | 7.69±0.32      | 427±17.91       | 231±16.56      | 0.92±0.03      | 186±7.99       |
| <b>Site 5</b>                   | 8.28±0.93      | 389±27.72       | 207±13.70      | 0.83±0.01      | 131±8.84       |

93

94

95

96 **Table S4.** The concentrations of heavy metals in water samples collected from five different sites of Rawal Lake (mg/l).

| Water sample   | Zn                     | Cd                        | Pb                     | Ni                      | Al                      | As                     | Ca                      | Co                     | Cr                     | Cu                     | Mn                     | Se                     |
|----------------|------------------------|---------------------------|------------------------|-------------------------|-------------------------|------------------------|-------------------------|------------------------|------------------------|------------------------|------------------------|------------------------|
| <b>Site 1</b>  | 1.36±0.06 <sup>b</sup> | 0.003±0.001 <sup>bc</sup> | 0.54±0.04 <sup>a</sup> | 0.24±0.04 <sup>ab</sup> | 10.22±0.10 <sup>b</sup> | 0.59±0.01 <sup>a</sup> | 43.65±0.05 <sup>b</sup> | 0.95±0.02 <sup>b</sup> | 0.42±0.01 <sup>c</sup> | 0.28±0.01 <sup>d</sup> | 0.75±0.01 <sup>d</sup> | 0.03±0.01 <sup>c</sup> |
| <b>Site 2</b>  | 2.75±0.05 <sup>a</sup> | 0.007±0.001 <sup>a</sup>  | 0.73±0.01 <sup>a</sup> | 0.29±0.01 <sup>b</sup>  | 12.48±0.08 <sup>a</sup> | 2.35±0.05 <sup>b</sup> | 65.2±0.10 <sup>a</sup>  | 2.48±0.02 <sup>a</sup> | 0.63±0.01 <sup>a</sup> | 1.83±0.03 <sup>a</sup> | 6.99±0.04 <sup>a</sup> | 0.87±0.01 <sup>a</sup> |
| <b>Site 3</b>  | 1.44±0.04 <sup>b</sup> | 0.002±0.0002 <sup>c</sup> | 0.44±0.02 <sup>a</sup> | 0.24±0.01 <sup>ab</sup> | 6.65±0.05 <sup>d</sup>  | 1.48±0.03 <sup>c</sup> | 28.32±0.02 <sup>c</sup> | 0.63±0.01 <sup>d</sup> | 0.05±0.01 <sup>b</sup> | 0.62±0.01 <sup>c</sup> | 2.76±0.01 <sup>c</sup> | 0.65±0.01 <sup>a</sup> |
| <b>Site 4</b>  | 2.52±0.02 <sup>a</sup> | 0.005±0.001 <sup>ab</sup> | 0.62±0.02 <sup>a</sup> | 0.23±0.01 <sup>a</sup>  | 4.75±0.05 <sup>c</sup>  | 0.07±0.01 <sup>d</sup> | 41.72±0.02 <sup>c</sup> | 0.03±0.01 <sup>e</sup> | 0.58±0.01 <sup>d</sup> | 0.08±0.01 <sup>c</sup> | 3.84±0.02 <sup>b</sup> | 0.14±0.01 <sup>b</sup> |
| <b>Site 5</b>  | 2.54±0.04 <sup>a</sup> | 0.006±0.001 <sup>a</sup>  | 0.45±0.01 <sup>a</sup> | 0.28±0.01 <sup>ab</sup> | 8.73±0.03 <sup>c</sup>  | 0.86±0.01 <sup>e</sup> | 32.68±0.03 <sup>d</sup> | 0.82±0.01 <sup>c</sup> | 0.06±0.01 <sup>c</sup> | 0.91±0.01 <sup>b</sup> | 0.21±0.01 <sup>c</sup> | 0.09±0.01 <sup>c</sup> |
| <b>Average</b> | 2.12±0.67              | 0.0046±0.002              | 0.56±0.122             | 0.26±0.027              | 8.57±3.013              | 1.07±0.877             | 42.31±14.27             | 0.98±0.91              | 0.35±0.28              | 0.74±0.69              | 2.91±2.72              | 0.36±0.38              |
| WHO [138]      | 3.00                   | 3.00                      | 0.01                   | 0.07                    | 0.20                    | 0.01                   | 100.00                  | 0.04                   | 0.05                   | 2.00                   | 0.10                   | 0.04                   |
| PakEPA [46]    | 5.00                   | 0.01                      | 0.05                   | 0.02                    | N/A                     | N/A                    | 200.00                  | N/A                    | 0.05                   | 2.00                   | 0.50                   | N/A                    |
| USEPA [139]    | 5.00                   | 5.00                      | 0.01                   | 0.70                    | 0.05-0.02               | 0.01                   | N/A                     | N/A                    | 0.10                   | 1.30                   | 5.00                   | 0.05                   |

97 Values are presented as mean ± SD (n = 3). Means with different lowercase letters within a column are significantly different (p < 0.05, Tukey

98 Honestly Significant Difference test).

99 **Table S5.** Weight, complete length and coefficient of condition (K) of different fish species from Rawal Lake.

| <b>Fish specie</b>   | <b>Weight(g)</b>         | <b>Complete length(mm)</b> | <b>Coefficient of condition(gmm<sup>-3</sup>)</b> |
|----------------------|--------------------------|----------------------------|---------------------------------------------------|
| <i>H.molitrix</i>    | 475±107.07 <sup>b</sup>  | 340.36±28.74 <sup>b</sup>  | 1.20±0.03 <sup>bc</sup>                           |
| <i>O.mossambicus</i> | 183.3±28.87 <sup>c</sup> | 207.77±16.13 <sup>c</sup>  | 2.08±0.16 <sup>a</sup>                            |
| <i>C.mrigal</i>      | 600±50 <sup>a</sup>      | 378.9±9.57 <sup>a</sup>    | 1.11±0.13 <sup>c</sup>                            |
| <i>C.catla</i>       | 300±35.36 <sup>d</sup>   | 271.78±5.39 <sup>d</sup>   | 1.55±0.08 <sup>b</sup>                            |
| <i>C.idella</i>      | 350±21.21 <sup>c</sup>   | 284.48±3.59 <sup>cd</sup>  | 1.56±0.06 <sup>b</sup>                            |
| <i>C.carpio</i>      | 350±7.07 <sup>c</sup>    | 294.64±7.18 <sup>c</sup>   | 1.42±0.08 <sup>bc</sup>                           |

100 Values are presented as mean ± SD (n = 3). Means with different lowercase letters within a column are significantly different (p < 0.05, Tukey  
 101 Honestly Significant Difference test).

102

103

104 **Table S6.**Bioconcentration factor (BCF) of heavy metals in examined fish species.

| <b>Fish Species</b>  | <b>Zn</b>              | <b>Cd</b>                | <b>Pb</b>               | <b>Ni</b>              | <b>Al</b>              | <b>As</b>              | <b>Ca</b>              | <b>Co</b>               | <b>Cr</b>              | <b>Cu</b>               | <b>Mn</b>                | <b>Se</b>               |
|----------------------|------------------------|--------------------------|-------------------------|------------------------|------------------------|------------------------|------------------------|-------------------------|------------------------|-------------------------|--------------------------|-------------------------|
| <i>H.molitrix</i>    | 2.34±0.09 <sup>d</sup> | 40.58±0.32 <sup>e</sup>  | 0.701±0.03 <sup>c</sup> | 0.20±0.02 <sup>d</sup> | 0.41±0.03 <sup>d</sup> | 0.07±0.01 <sup>e</sup> | 0.82±0.02 <sup>a</sup> | 0.09±0.01 <sup>a</sup>  | 0.16±0.02 <sup>d</sup> | 0.11±0.01 <sup>a</sup>  | 0.03±0.01 <sup>a</sup>   | 0.14±0.01 <sup>d</sup>  |
| <i>O.mossambicus</i> | 1.94±0.03 <sup>e</sup> | 47.81±0.10 <sup>d</sup>  | 0.08±0.02 <sup>e</sup>  | 0.21±0.02 <sup>d</sup> | 0.59±0.02 <sup>c</sup> | 0.07±0.01 <sup>e</sup> | 0.28±0.01 <sup>d</sup> | 0.08±0.01 <sup>a</sup>  | 0.11±0.01 <sup>e</sup> | 0.05±0.01 <sup>c</sup>  | 0.02±0.01 <sup>ab</sup>  | 0.25±0.01 <sup>a</sup>  |
| <i>C.mrigal</i>      | 3.45±0.04 <sup>b</sup> | 105.00±0.13 <sup>a</sup> | 4.09±0.04 <sup>a</sup>  | 2.62±0.02 <sup>a</sup> | 1.18±0.02 <sup>a</sup> | 1.83±0.03 <sup>a</sup> | 0.60±0.02 <sup>c</sup> | 0.02±0.01 <sup>bc</sup> | 3.68±0.02 <sup>a</sup> | 0.01±0.01 <sup>d</sup>  | 0.01±0.01 <sup>b</sup>   | 0.19±0.01 <sup>b</sup>  |
| <i>C.catla</i>       | 2.63±0.03 <sup>c</sup> | 84.78±0.20 <sup>b</sup>  | 3.69±0.02 <sup>b</sup>  | 0.12±0.01 <sup>e</sup> | 0.11±0.01 <sup>e</sup> | 0.14±0.01 <sup>d</sup> | 0.23±0.01 <sup>e</sup> | 0.01±0.01 <sup>c</sup>  | 0.23±0.01 <sup>c</sup> | 0.08±0.01 <sup>b</sup>  | 0.01±0.01 <sup>b</sup>   | 0.17±0.01 <sup>bc</sup> |
| <i>C.idella</i>      | 1.67±0.02 <sup>f</sup> | 15.94±0.08 <sup>f</sup>  | 0.10±0.02 <sup>e</sup>  | 0.27±0.01 <sup>c</sup> | 0.62±0.02 <sup>c</sup> | 0.35±0.01 <sup>c</sup> | 0.24±0.01 <sup>e</sup> | 0.02±0.01 <sup>bc</sup> | 2.04±0.01 <sup>b</sup> | 0.06±0.01 <sup>bc</sup> | 0.01±0.01 <sup>b</sup>   | 0.17±0.01 <sup>bc</sup> |
| <i>C.carpio</i>      | 4.02±0.03 <sup>a</sup> | 49.27±0.15 <sup>c</sup>  | 0.33±0.02 <sup>d</sup>  | 2.15±0.04 <sup>b</sup> | 0.82±0.02 <sup>b</sup> | 0.97±0.02 <sup>b</sup> | 0.73±0.01 <sup>b</sup> | 0.04±0.01 <sup>b</sup>  | 0.26±0.01 <sup>c</sup> | 0.01±0.01 <sup>d</sup>  | 0.005±0.01 <sup>ab</sup> | 0.16±0.01 <sup>cd</sup> |

105 Values are presented as mean ± SD (n = 3). Means with different lowercase letters within a column are significantly different (p &lt; 0.05, Tukey

106 Honestly Significant Difference test).

**Table S7.** Principal component analysis (PCA) factor score for heavy metals concentrations in different fish species of Rawal Lake.

| <b>Variables</b>       | <b>PC1</b> | <b>PC2</b> |
|------------------------|------------|------------|
| Zn                     | 0.31       | 0.24       |
| Cd                     | 0.28       | -0.15      |
| Pb                     | 0.24       | -0.30      |
| Ni                     | 0.38       | 0.23       |
| Al                     | 0.32       | 0.26       |
| As                     | 0.40       | 0.11       |
| Ca                     | 0.09       | 0.57       |
| Co                     | -0.25      | 0.46       |
| Cr                     | 0.30       | -0.11      |
| Cu                     | -0.34      | -0.06      |
| Mn                     | -0.28      | 0.36       |
| Se                     | 0.00       | -0.10      |
| Eigen value            | 5.89       | 2.35       |
| Standard deviation     | 2.43       | 1.53       |
| Proportion of variance | 0.49       | 0.20       |
| Cumulative proportion  | 0.49       | 0.69       |

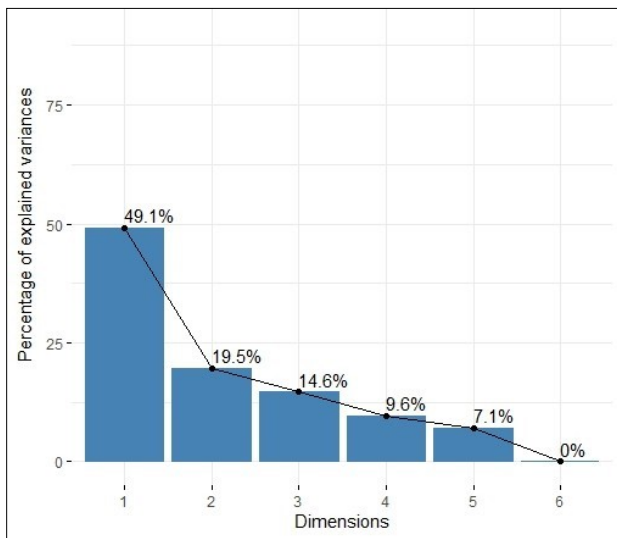

(a). Scree plot

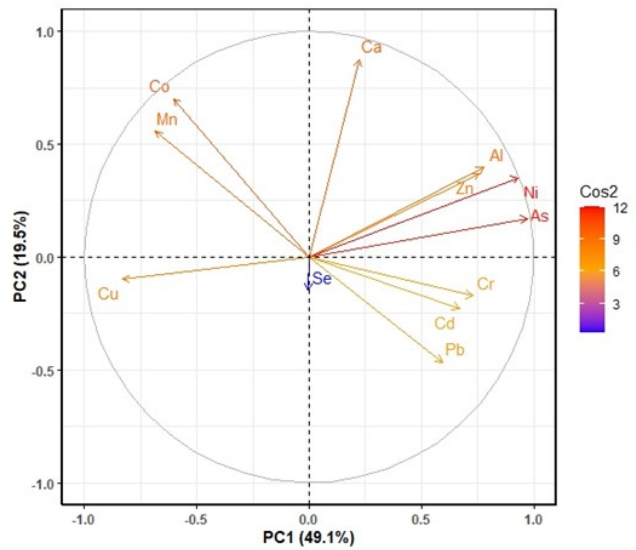

(b). Loading plot

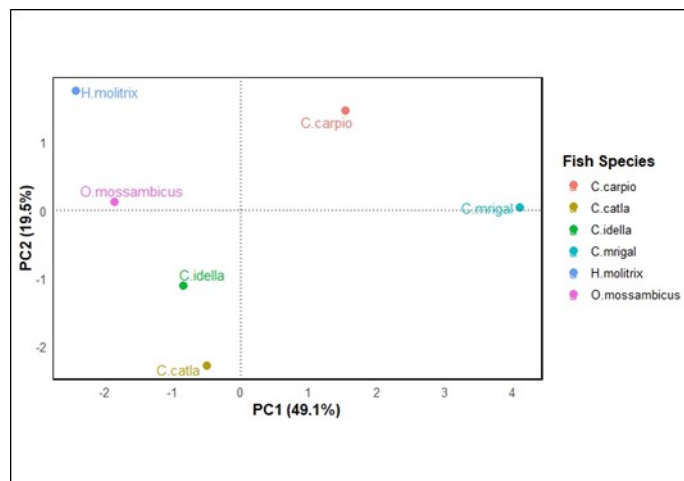

(c) Score plot

**Figure S1 (a) Scree plot (b) Loading plot (c) Score plot of PCA of heavy metals and the examined fish species**

| Fish Species         | Zn                      | Cd                       | Pb                      | Ni                      | Al                      | As                       | Ca                       | Co                      | Cr                       | Cu                       | Mn                       | Se                       |
|----------------------|-------------------------|--------------------------|-------------------------|-------------------------|-------------------------|--------------------------|--------------------------|-------------------------|--------------------------|--------------------------|--------------------------|--------------------------|
| <i>H.molitrix</i>    | 32.90±1.21 <sup>c</sup> | 75.00±2.36 <sup>a</sup>  | 34.62±0.96 <sup>c</sup> | 47.00±4.08 <sup>b</sup> | 66.56±5.00 <sup>a</sup> | 75.00±1.59 <sup>a</sup>  | 70.22±5.75 <sup>ab</sup> | 55.56±3.79 <sup>b</sup> | 35.09±2.07 <sup>b</sup>  | 50.63±8.02 <sup>b</sup>  | 41.09±3.01 <sup>ab</sup> | 80.00±6.06 <sup>a</sup>  |
| <i>O.mossambicus</i> | 24.23±1.53 <sup>c</sup> | 36.36±2.87 <sup>b</sup>  | 57.45±2.21 <sup>b</sup> | 36.36±0.95 <sup>c</sup> | 73.01±1.50 <sup>a</sup> | 28.57±0.55 <sup>b</sup>  | 64.73±1.08 <sup>bc</sup> | 75.00±2.71 <sup>a</sup> | 25.00±3.04 <sup>c</sup>  | 52.63±2.54 <sup>c</sup>  | 17.86±0.61 <sup>d</sup>  | 33.07±1.69 <sup>c</sup>  |
| <i>C.mrigal</i>      | 55.66±1.70 <sup>b</sup> | 74.53±1.50 <sup>a</sup>  | 87.40±4.47 <sup>a</sup> | 50.75±1.00 <sup>b</sup> | 41.06±6.06 <sup>b</sup> | 30.10±3.73 <sup>b</sup>  | 34.93±2.65 <sup>d</sup>  | 30.00±4.07 <sup>c</sup> | 20.31±1.43 <sup>cd</sup> | 40.00±1.10 <sup>cd</sup> | 33.33±2.34 <sup>c</sup>  | 86.95±10.48 <sup>a</sup> |
| <i>C.catla</i>       | 51.61±2.98 <sup>b</sup> | 51.28±6.71 <sup>b</sup>  | 52.19±6.26 <sup>b</sup> | 66.67±3.06 <sup>a</sup> | 28.45±2.02 <sup>c</sup> | 20.00±1.45 <sup>a</sup>  | 54.30±1.43 <sup>c</sup>  | 45.45±3.76 <sup>b</sup> | 50.00±1.45 <sup>a</sup>  | 34.48±2.18 <sup>a</sup>  | 33.33±1.91 <sup>c</sup>  | 33.79±2.68 <sup>c</sup>  |
| <i>C.idella</i>      | 69.77±0.96 <sup>a</sup> | 40.91±2.78 <sup>b</sup>  | 35.29±1.05 <sup>c</sup> | 28.57±3.66 <sup>d</sup> | 67.07±1.72 <sup>a</sup> | 67.56±5.60 <sup>b</sup>  | 74.56±3.58 <sup>a</sup>  | 50.20±4.46 <sup>b</sup> | 18.30±2.45 <sup>d</sup>  | 23.26±2.67 <sup>d</sup>  | 38.89±2.35 <sup>bc</sup> | 80.65±1.07 <sup>a</sup>  |
| <i>C.carpio</i>      | 52.29±9.15 <sup>b</sup> | 66.18±10.18 <sup>a</sup> | 40.36±5.70 <sup>c</sup> | 47.27±3.04 <sup>b</sup> | 46.22±1.10 <sup>b</sup> | 61.04±12.50 <sup>a</sup> | 73.80±5.23 <sup>ab</sup> | 50.00±4.68 <sup>b</sup> | 33.33±2.70 <sup>b</sup>  | 45.45±3.39 <sup>b</sup>  | 50.00±7.42 <sup>a</sup>  | 51.91±4.58 <sup>b</sup>  |

108 **Table S8.** Bioaccessibility (%) of heavy metals in muscles of different fish species.

109 Values are presented as mean ± SD (n = 3). Means with different lowercase letters within a column are significantly different (p < 0.05, Tukey

110 Honestly Significant Difference test).

**Table S9.** Average daily dose (ADD) of heavy metals content (mg/kg/day) through Rawal lake fish consumption by the human population based on bioaccessible fraction

| Fish species         | Population | Age group | Zn      | Cd      | Pb      | Ni      | Al      | As      | Ca      | Co      | Cr      | Cu      | Mn      | Se      |
|----------------------|------------|-----------|---------|---------|---------|---------|---------|---------|---------|---------|---------|---------|---------|---------|
| <i>H.molitrix</i>    | Fisherfolk | Children  | 2.5E-03 | 2.1E-04 | 2.1E-04 | 3.6E-05 | 3.6E-03 | 9.2E-05 | 3.7E-02 | 7.6E-06 | 3.1E-05 | 6.1E-05 | 4.6E-05 | 6.1E-05 |
|                      |            | Adult     | 2.2E-03 | 1.9E-04 | 1.8E-04 | 3.2E-05 | 3.2E-03 | 8.2E-05 | 3.4E-02 | 6.8E-06 | 2.7E-05 | 5.5E-05 | 4.1E-05 | 5.5E-05 |
|                      | General    | Children  | 2.5E-04 | 2.1E-05 | 2.1E-05 | 3.6E-06 | 3.6E-04 | 9.2E-06 | 3.7E-03 | 7.6E-07 | 3.1E-06 | 6.1E-06 | 4.6E-06 | 6.1E-06 |
|                      |            | Adult     | 2.2E-04 | 1.9E-05 | 1.8E-05 | 3.2E-06 | 3.2E-04 | 8.2E-06 | 3.4E-03 | 6.8E-07 | 2.7E-06 | 5.5E-06 | 4.1E-06 | 5.5E-06 |
| <i>O.mossambicus</i> | Fisherfolk | Children  | 1.5E-03 | 1.2E-04 | 4.1E-05 | 3.1E-05 | 5.6E-03 | 3.1E-05 | 1.2E-02 | 9.2E-05 | 1.5E-05 | 3.1E-05 | 8.6E-05 | 4.6E-05 |
|                      |            | Adult     | 1.4E-03 | 1.1E-04 | 3.7E-05 | 2.7E-05 | 5.0E-03 | 2.7E-05 | 1.0E-02 | 8.2E-05 | 1.4E-05 | 2.7E-05 | 7.7E-05 | 4.1E-05 |
|                      | General    | Children  | 1.5E-04 | 1.2E-04 | 4.1E-06 | 3.1E-06 | 5.6E-04 | 3.1E-06 | 1.2E-03 | 9.2E-06 | 1.5E-06 | 3.1E-06 | 8.6E-06 | 4.6E-06 |
|                      |            | Adult     | 1.4E-04 | 1.1E-05 | 3.7E-06 | 2.7E-06 | 5.0E-04 | 2.7E-06 | 1.0E-03 | 8.2E-06 | 1.4E-06 | 2.7E-06 | 7.7E-06 | 4.1E-06 |
| <i>C.mrigal</i>      | Fisherfolk | Children  | 6.2E-03 | 5.5E-04 | 3.0E-03 | 5.2E-04 | 6.3E-03 | 9.0E-04 | 1.3E-02 | 9.2E-06 | 4.0E-04 | 6.1E-06 | 2.3E-05 | 9.2E-05 |
|                      |            | Adult     | 5.6E-03 | 4.9E-04 | 2.7E-03 | 4.7E-04 | 5.7E-03 | 8.1E-04 | 1.2E-02 | 8.2E-06 | 3.6E-04 | 5.5E-06 | 2.1E-05 | 8.2E-05 |
|                      | General    | Children  | 6.2E-04 | 5.5E-05 | 3.0E-04 | 5.2E-05 | 6.3E-04 | 9.0E-05 | 1.3E-03 | 9.2E-07 | 4.0E-05 | 6.1E-07 | 2.3E-06 | 9.2E-06 |
|                      |            | Adult     | 5.6E-04 | 4.9E-05 | 2.7E-04 | 4.7E-05 | 5.7E-04 | 8.1E-05 | 1.2E-03 | 8.2E-07 | 3.6E-05 | 5.5E-07 | 2.1E-06 | 8.2E-06 |
| <i>C.catla</i>       | Fisherfolk | Children  | 4.4E-03 | 3.1E-04 | 1.6E-03 | 3.1E-05 | 4.1E-04 | 4.6E-05 | 8.1E-03 | 7.6E-06 | 6.1E-05 | 3.1E-05 | 1.8E-05 | 3.1E-05 |
|                      |            | Adult     | 3.9E-03 | 2.7E-04 | 1.5E-03 | 2.7E-05 | 3.7E-04 | 4.1E-05 | 7.3E-03 | 6.8E-06 | 5.5E-05 | 2.7E-05 | 1.6E-05 | 2.7E-05 |
|                      | General    | Children  | 4.4E-04 | 3.1E-05 | 1.6E-04 | 3.1E-06 | 4.1E-05 | 4.6E-06 | 8.1E-04 | 7.6E-07 | 6.1E-06 | 3.1E-06 | 1.8E-06 | 3.1E-06 |
|                      |            | Adult     | 3.9E-04 | 2.7E-05 | 1.5E-04 | 2.7E-06 | 3.7E-05 | 4.1E-06 | 7.3E-04 | 6.8E-07 | 5.5E-06 | 2.7E-06 | 1.6E-06 | 2.7E-06 |
| <i>C.idella</i>      | Fisherfolk | Children  | 3.8E-03 | 4.6E-05 | 3.1E-05 | 2.3E-05 | 5.5E-03 | 3.8E-04 | 1.2E-02 | 1.5E-05 | 2.0E-04 | 1.5E-05 | 2.8E-05 | 7.6E-05 |
|                      |            | Adult     | 3.4E-03 | 4.1E-05 | 2.7E-05 | 2.1E-05 | 4.9E-03 | 3.4E-04 | 1.0E-02 | 1.4E-05 | 1.8E-04 | 1.4E-05 | 2.5E-05 | 6.8E-05 |
|                      | General    | Children  | 3.8E-04 | 4.6E-06 | 3.1E-06 | 2.3E-06 | 5.5E-04 | 3.8E-05 | 1.2E-03 | 1.5E-06 | 2.0E-05 | 1.5E-06 | 2.8E-06 | 7.6E-06 |
|                      |            | Adult     | 3.4E-04 | 4.1E-06 | 2.7E-06 | 2.1E-06 | 4.9E-04 | 3.4E-05 | 1.0E-03 | 1.4E-06 | 1.8E-05 | 1.4E-06 | 2.5E-06 | 6.8E-06 |
| <i>C.carpio</i>      | Fisherfolk | Children  | 6.8E-03 | 2.3E-04 | 1.1E-04 | 4.0E-04 | 4.9E-03 | 9.6E-04 | 3.5E-02 | 3.1E-05 | 4.6E-05 | 7.6E-06 | 2.4E-05 | 4.6E-05 |
|                      |            | Adult     | 6.1E-03 | 2.1E-04 | 1.0E-04 | 3.6E-04 | 4.4E-03 | 8.6E-04 | 3.1E-02 | 2.7E-05 | 4.1E-05 | 6.8E-06 | 2.2E-05 | 4.1E-05 |
|                      | General    | Children  | 6.8E-04 | 2.3E-05 | 1.1E-05 | 4.0E-05 | 4.9E-04 | 9.6E-05 | 3.5E-03 | 3.1E-06 | 4.6E-06 | 7.6E-07 | 2.4E-06 | 4.6E-06 |
|                      |            | Adult     | 6.1E-04 | 2.1E-05 | 1.0E-05 | 3.6E-05 | 4.4E-04 | 8.6E-05 | 3.1E-03 | 2.7E-06 | 4.1E-06 | 6.8E-07 | 2.2E-06 | 4.1E-06 |
